# Supplementary material for: Ginsenoside-Rg1 Rescues Stress-Induced Depression-Like Behaviors via Suppression of Oxidative Stress and Neural Inflammation in Rats
Source: Hindawi journal article supplement (doi:10.1155/2020/2325391), 2020-03-23
Supplement: f1 [file 2325391.f1.pdf]

**Supplemental Table 1.** PCR primers used in this study

| <i>Gene</i>   | <i>Forward (5'→3')</i>             | <i>Reverse (5'→3')</i>             |
|---------------|------------------------------------|------------------------------------|
| IL-1 $\beta$  | AAG ATG AAG GGC TGC TTC CAA<br>ACC | ATA CTG CCT GCC TGA AGC TCT<br>TGT |
| IFN- $\gamma$ | ATT CAT GAG CAT CGC CAA GTT<br>C   | TGA CAG CTG GTG AAT CAC TCT<br>GAT |
| TNF- $\alpha$ | TGA TCG GTC CCA ACA AGG A          | TGC TTG GTG GTT TGC TAC GA         |
| Bcl-2         | GGA TCC AGG ATA ACG GAG GC         | ATG CAC CCA GAG TGA TGC AG         |
| Bax           | TCT TCA AAC TGC TGG GCC ATT        | CTT GTC ACC TGC CTG ACT GCT        |
| Caspase3      | GGA GCT TGG AAC GCG AAG AA         | ACA CAA GCC CAT TTC AGG GT         |
| Caspase9      | CAA GAA GAG CGG TTC CTG GT         | CAG AAA CAG CAT TGG CGA CC         |
| NOX1          | CCT GAA GGA TCC CAT CAG AGA        | TGG AGG TCT GGA GCC TCT TA         |
| NOX4          | CCG GAC AGT CCT GGC TTA TC         | TTG AGG GCA TTC ACC AAG TG         |
| GAPDH         | AGT GCC AGC CTC GTC TCA TA         | GGT AAC CAG GCG TCC GAT AC         |
